# Supplementary material
Source: MDPI journal article supplement (https://www.mdpi.com/2073-4441/14/23/3825)
Supplement: s1 [file s1 › water-2038344-supplementary.pdf]

## Supplementary Information

### Chemical-Free Biologically Enhanced Primary Treatment of Raw Wastewater to Improve Carbon Capture

Muhammad Rizwan Azhar<sup>a\*</sup>, Paul Nolan<sup>b</sup>, Keith Cadee<sup>b</sup>, Mehdi Khiadani<sup>c</sup>

<sup>a</sup> Minerals Resource Recovery Centre, School of Engineering, Edith Cowan University, 270 Joondalup Drive, Joondalup, WA, 6025, Australia.

<sup>b</sup> Water Corporation, 629 Newcastle Street, Leederville WA 6007, Australia.

<sup>c</sup> School of Engineering, Edith Cowan University, 270 Joondalup Drive, Joondalup, WA, 6025, Australia.

## Supplementary Information

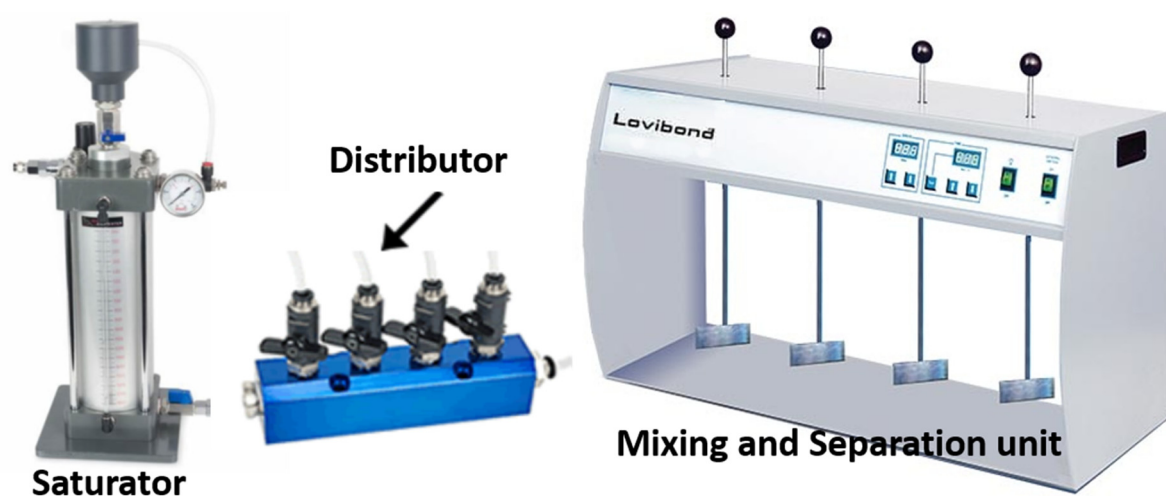

**Figure S1.** Equipment for bench scale testing of BEPT process.

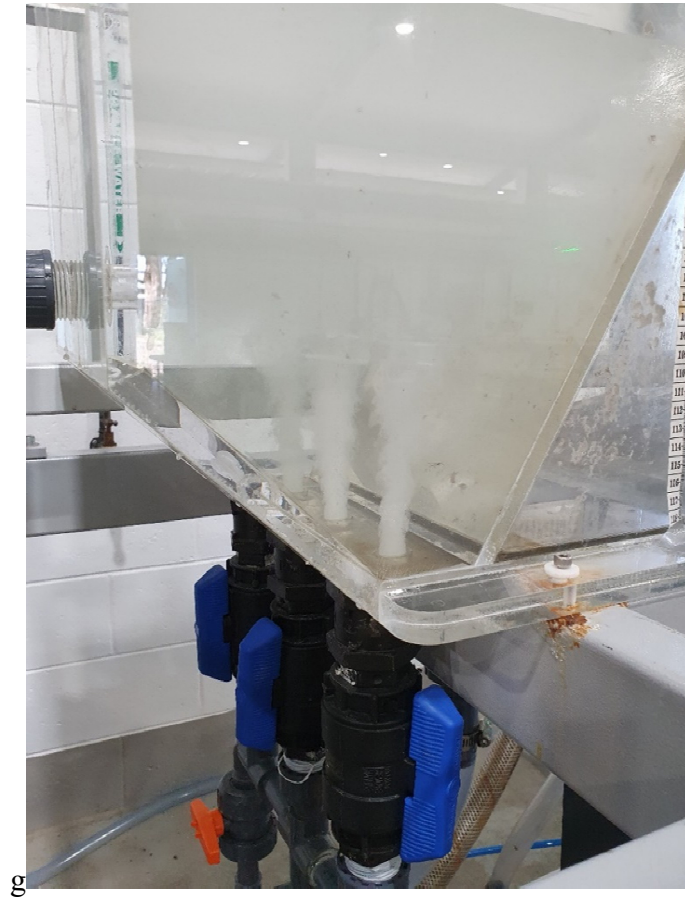

**Figure S2.** Generation of bubbles with tap water in pilot DAF contact zone.

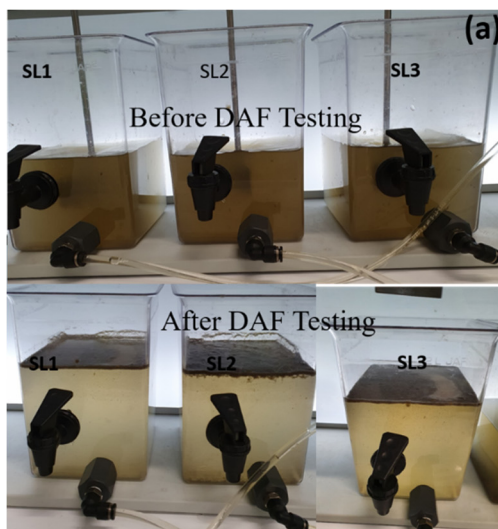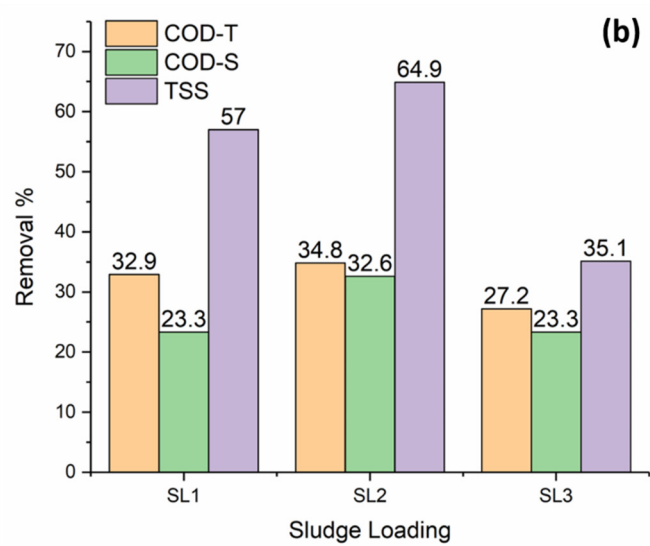

**Figure S3.** Performance of bench scale BEPT process.
